# Supplementary material for: VEGF Regulates Region-Specific Localization of Perivascular Bone Marrow–Derived Cells in Glioblastoma
Source: Oxford University Press journal article supplement (doi:10.1158/0008-5472.can-13-3119), 2014-05-13
Supplement: 00085472can133119-sup-fig4.pdf [file 00085472can133119-sup-fig4.pdf]

Early Stage Tumor

Non treated Late Stage Tumor

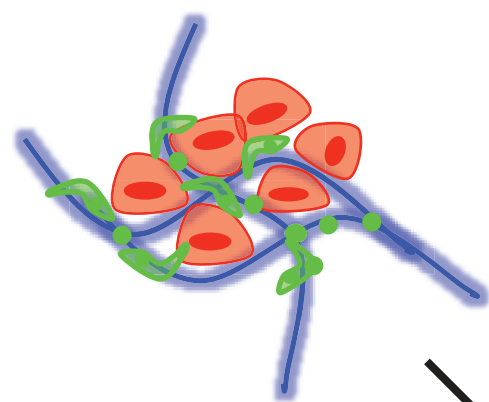

A

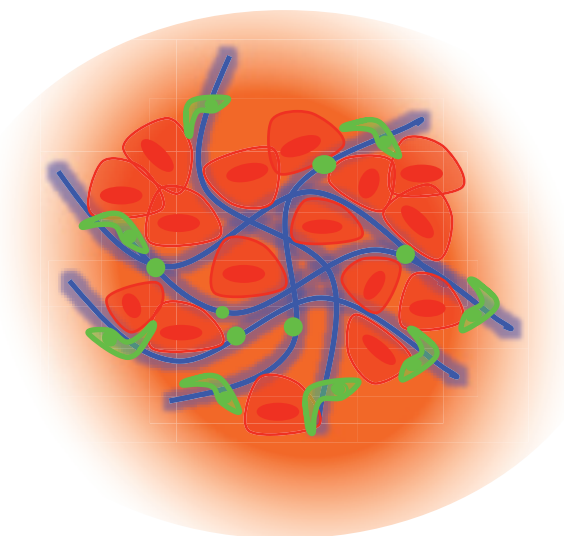

Increased VEGF signal from increased tumor mass

B

C

VEGF Inhibition

RTx Treatment

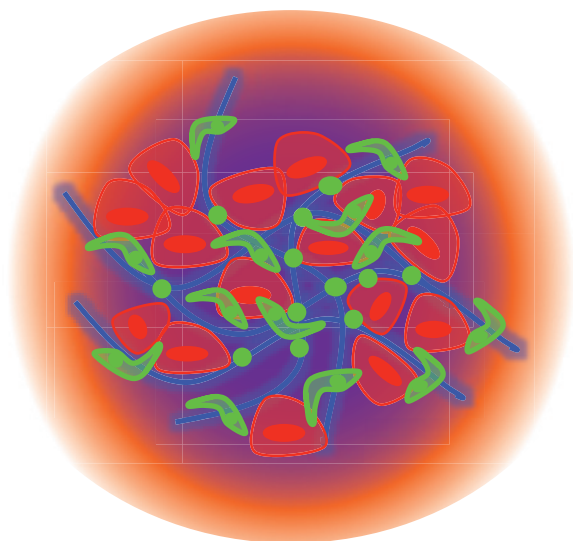

Direct VEGF inhibition results in compensatory ANG2 signal

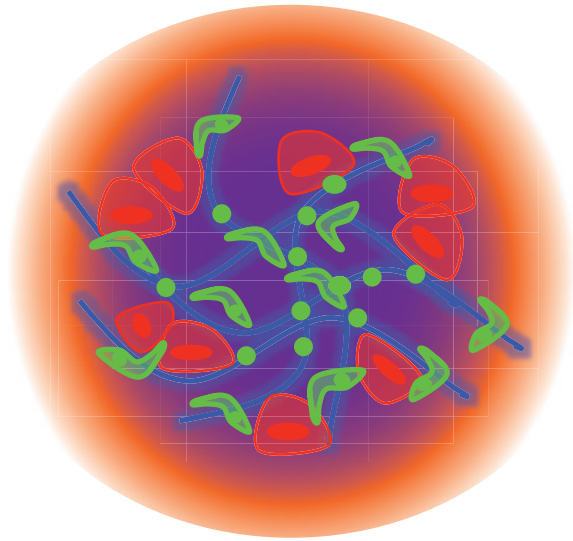

Loss of tumor cells as a consequence of radiation, decreases VEGF signal, resulting in compensatory ANG2 signal

Legend

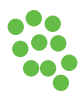

Undifferentiated Bone Marrow

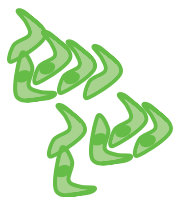

Differentiated BMDC

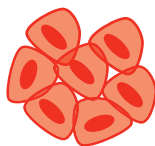

GBM

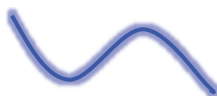

Vessels

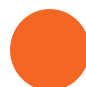

VEGF

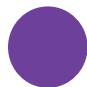

ANG2
